# Supplementary material for: Green synthesis of a self-assembled rutile mesocrystalline photocatalyst
Source: Royal Society of Chemistry journal article supplement (doi:10.1039/b922477g), 2010-01-01
Supplement: b922477g.pdf [file b922477g.pdf]

## Supporting Information

# Green Synthesis of a Self-Assembled Rutile Mesocrystalline Photocatalyst

Dieqing Zhang,<sup>a</sup> Guisheng Li,<sup>a,b</sup> Feng Wang<sup>a</sup> and Jimmy C. Yu<sup>\*a</sup>

<sup>a</sup>Department of Chemistry, Environmental Science Programme, and Centre of Novel Functional Molecules, The Chinese University of Hong Kong, Shatin, New Territories, Hong Kong, China.

Fax: +852 2603-5057; Tel: +852 2609-6268; E-mail: [jimyu@cuhk.edu.hk](mailto:jimyu@cuhk.edu.hk)

<sup>b</sup>Department of Chemistry, Shanghai Normal University, Shanghai 200234, China

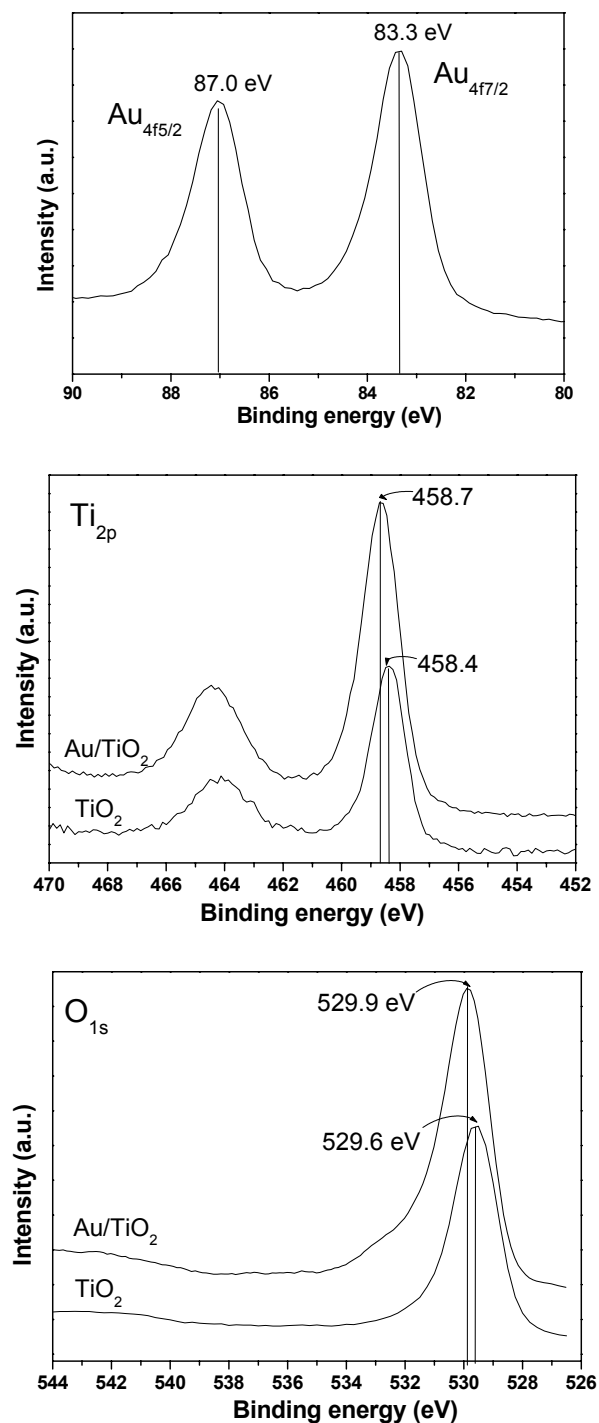

Fig. S1 XPS spectra of Au4f, Ti2p and O1s of the pure and gold-doped rutile TiO<sub>2</sub>.
